# Supplementary material for: Soil respiration across a variety of tree-covered urban green spaces in Helsinki, Finland
Source: Copernicus journal article supplement (doi:10.5194/soil-10-381-2024), 2024-06-12
Supplement: Supplementary file 1 [file soil-10-381-2024-supplement.pdf]

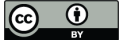

*Supplement of*

## **Soil respiration across a variety of tree-covered urban green spaces in Helsinki, Finland**

**Esko Karvinen et al.**

*Correspondence to:* Esko Karvinen (esko.karvinen@fmi.fi)

The copyright of individual parts of the supplement might differ from the article licence.

**Table S1:** Results of the week-level Kruskal-Wallis tests on soil respiration ( $R_{GF}$ ). Significance is reported as: \*p-value < 0.10, \*\*p-value < 0.05, and \*\*\*p-value < 0.005. Number of replicates refers to the number of measurement replicates conducted at each site on each week, and DF refers to degrees of freedom.

| Date       | Week | Number of replicates |        |      |            | DF | H Statistic | P-value | Significance |
|------------|------|----------------------|--------|------|------------|----|-------------|---------|--------------|
|            |      | Orchard              | Forest | Park | Streetside |    |             |         |              |
| 2020-05-14 | 20   | 0                    | 8      | 8    | 8          | 2  | 0.585       | 0.746   |              |
| 2020-05-19 | 21   | 0                    | 8      | 8    | 8          | 2  | 2.205       | 0.332   |              |
| 2020-05-29 | 22   | 0                    | 8      | 7    | 8          | 2  | 2.646       | 0.266   |              |
| 2020-06-08 | 23   | 0                    | 8      | 8    | 8          | 2  | 3.695       | 0.158   |              |
| 2020-06-12 | 24   | 0                    | 8      | 8    | 8          | 2  | 5.315       | 0.070   | *            |
| 2020-06-22 | 25   | 0                    | 8      | 8    | 8          | 2  | 4.745       | 0.093   | *            |
| 2020-06-26 | 26   | 0                    | 8      | 8    | 8          | 2  | 6.995       | 0.030   | **           |
| 2020-07-02 | 27   | 0                    | 6      | 8    | 8          | 2  | 11.310      | 0.003   | ***          |
| 2020-07-10 | 28   | 0                    | 7      | 8    | 8          | 2  | 5.146       | 0.076   | *            |
| 2020-07-17 | 29   | 0                    | 8      | 8    | 8          | 2  | 1.905       | 0.386   |              |
| 2020-07-23 | 30   | 0                    | 8      | 8    | 8          | 2  | 4.595       | 0.101   |              |
| 2020-07-29 | 31   | 0                    | 7      | 8    | 8          | 2  | 4.720       | 0.094   | *            |
| 2020-08-04 | 32   | 0                    | 7      | 8    | 8          | 2  | 1.791       | 0.408   |              |
| 2020-08-10 | 33   | 0                    | 8      | 8    | 8          | 2  | 0.380       | 0.827   |              |
| 2020-08-21 | 34   | 0                    | 8      | 8    | 8          | 2  | 6.720       | 0.035   | **           |
| 2020-08-31 | 36   | 0                    | 5      | 3    | 8          | 2  | 3.232       | 0.199   |              |
| 2020-09-09 | 37   | 0                    | 8      | 8    | 8          | 2  | 3.645       | 0.162   |              |
| 2020-09-15 | 38   | 0                    | 8      | 8    | 8          | 2  | 9.060       | 0.011   | **           |
| 2020-09-21 | 39   | 0                    | 8      | 8    | 8          | 2  | 3.500       | 0.174   |              |
| 2020-09-28 | 40   | 0                    | 8      | 8    | 8          | 2  | 7.620       | 0.022   | **           |
| 2021-05-07 | 18   | 8                    | 8      | 8    | 8          | 3  | 13.372      | 0.004   | ***          |
| 2021-05-11 | 19   | 8                    | 8      | 8    | 8          | 3  | 17.915      | 0.000   | ***          |
| 2021-05-20 | 20   | 8                    | 8      | 8    | 8          | 3  | 4.827       | 0.185   |              |
| 2021-05-28 | 21   | 0                    | 8      | 8    | 8          | 2  | 0.540       | 0.763   |              |
| 2021-06-01 | 22   | 8                    | 8      | 8    | 8          | 3  | 8.151       | 0.043   | **           |
| 2021-06-10 | 23   | 8                    | 8      | 8    | 8          | 3  | 11.534      | 0.009   | **           |
| 2021-06-16 | 24   | 8                    | 8      | 8    | 8          | 3  | 8.298       | 0.040   | **           |
| 2021-06-24 | 25   | 0                    | 8      | 8    | 8          | 2  | 15.440      | 0.000   | ***          |
| 2021-06-29 | 26   | 8                    | 8      | 8    | 8          | 3  | 7.321       | 0.062   | *            |
| 2021-07-09 | 27   | 0                    | 8      | 8    | 8          | 2  | 2.940       | 0.230   |              |
| 2021-07-15 | 28   | 8                    | 8      | 8    | 8          | 3  | 3.190       | 0.363   |              |
| 2021-07-22 | 29   | 0                    | 8      | 8    | 8          | 2  | 1.995       | 0.369   |              |
| 2021-07-29 | 30   | 8                    | 8      | 8    | 8          | 3  | 6.188       | 0.103   |              |
| 2021-08-03 | 31   | 0                    | 8      | 8    | 8          | 2  | 2.045       | 0.360   |              |
| 2021-08-12 | 32   | 8                    | 8      | 8    | 8          | 3  | 2.278       | 0.517   |              |
| 2021-08-20 | 33   | 0                    | 8      | 8    | 8          | 2  | 3.185       | 0.203   |              |
| 2021-08-23 | 34   | 8                    | 8      | 8    | 8          | 3  | 6.699       | 0.082   | *            |
| 2021-09-02 | 35   | 0                    | 8      | 8    | 8          | 2  | 4.385       | 0.112   |              |
| 2021-09-06 | 36   | 8                    | 8      | 8    | 8          | 3  | 6.156       | 0.104   |              |
| 2021-09-14 | 37   | 0                    | 8      | 8    | 8          | 2  | 7.955       | 0.019   | **           |
| 2021-09-23 | 38   | 8                    | 8      | 8    | 8          | 3  | 15.188      | 0.002   | ***          |

|            |    |   |   |   |   |   |        |       |     |
|------------|----|---|---|---|---|---|--------|-------|-----|
| 2021-09-30 | 39 | 0 | 8 | 8 | 8 | 2 | 9.680  | 0.008 | **  |
| 2022-05-06 | 18 | 8 | 8 | 8 | 0 | 2 | 8.105  | 0.017 | **  |
| 2022-05-11 | 19 | 8 | 8 | 8 | 0 | 2 | 1.905  | 0.386 |     |
| 2022-05-18 | 20 | 8 | 8 | 8 | 0 | 2 | 4.340  | 0.114 |     |
| 2022-05-24 | 21 | 8 | 8 | 8 | 0 | 2 | 5.645  | 0.059 | *   |
| 2022-05-30 | 22 | 2 | 8 | 8 | 0 | 2 | 3.829  | 0.147 |     |
| 2022-06-06 | 23 | 8 | 8 | 8 | 0 | 2 | 0.815  | 0.665 |     |
| 2022-06-14 | 24 | 8 | 8 | 8 | 0 | 2 | 5.415  | 0.067 | *   |
| 2022-06-21 | 25 | 8 | 8 | 8 | 0 | 2 | 3.935  | 0.140 |     |
| 2022-06-27 | 26 | 8 | 8 | 8 | 0 | 2 | 11.375 | 0.003 | *** |
| 2022-07-05 | 27 | 8 | 8 | 8 | 0 | 2 | 1.185  | 0.553 |     |
| 2022-07-14 | 28 | 8 | 8 | 8 | 0 | 2 | 1.040  | 0.595 |     |
| 2022-07-18 | 29 | 8 | 8 | 8 | 0 | 2 | 1.040  | 0.595 |     |
| 2022-07-26 | 30 | 8 | 8 | 8 | 0 | 2 | 3.305  | 0.192 |     |
| 2022-08-01 | 31 | 8 | 8 | 8 | 0 | 2 | 2.535  | 0.282 |     |
| 2022-08-11 | 32 | 8 | 8 | 8 | 0 | 2 | 5.055  | 0.080 | *   |
| 2022-08-16 | 33 | 8 | 8 | 8 | 0 | 2 | 0.620  | 0.733 |     |
| 2022-08-22 | 34 | 8 | 8 | 8 | 0 | 2 | 15.965 | 0.000 | *** |
| 2022-08-30 | 35 | 8 | 8 | 8 | 0 | 2 | 13.385 | 0.001 | *** |
| 2022-09-06 | 36 | 8 | 8 | 8 | 0 | 2 | 4.085  | 0.130 |     |
| 2022-09-16 | 37 | 8 | 8 | 8 | 0 | 2 | 7.715  | 0.021 | **  |
| 2022-09-21 | 38 | 8 | 8 | 8 | 0 | 2 | 6.305  | 0.043 | **  |
| 2022-09-26 | 39 | 8 | 8 | 8 | 0 | 2 | 10.905 | 0.004 | *** |

**Table S2:** Results of the week-level Kruskal-Wallis tests on soil moisture. Significance is reported as: \*p-value < 0.10, \*\*p-value < 0.05, and \*\*\*p-value < 0.005. Number of replicates refers to the number of measurement replicates conducted at each site on each week, and DF refers to degrees of freedom.

| Date       | Week | Number of replicates |        |      |            | DF | H Statistic | P-value | Significance |
|------------|------|----------------------|--------|------|------------|----|-------------|---------|--------------|
|            |      | Orchard              | Forest | Park | Streetside |    |             |         |              |
| 2020-05-14 | 20   | 0                    | 0      | 0    | 0          | -  | -           | -       |              |
| 2020-05-22 | 21   | 0                    | 6      | 6    | 0          | 1  | 0.006       | 0.936   |              |
| 2020-05-29 | 22   | 0                    | 6      | 6    | 3          | 2  | 0.625       | 0.732   |              |
| 2020-06-08 | 23   | 0                    | 6      | 6    | 3          | 2  | 1.358       | 0.507   |              |
| 2020-06-12 | 24   | 0                    | 6      | 6    | 4          | 2  | 1.161       | 0.560   |              |
| 2020-06-22 | 25   | 0                    | 6      | 6    | 4          | 2  | 0.989       | 0.610   |              |
| 2020-06-26 | 26   | 0                    | 6      | 6    | 4          | 2  | 1.430       | 0.489   |              |
| 2020-07-02 | 27   | 0                    | 6      | 6    | 4          | 2  | 0.544       | 0.762   |              |
| 2020-07-10 | 28   | 0                    | 6      | 6    | 4          | 2  | 1.208       | 0.547   |              |
| 2020-07-17 | 29   | 0                    | 6      | 6    | 4          | 2  | 1.176       | 0.555   |              |
| 2020-07-23 | 30   | 0                    | 6      | 5    | 4          | 2  | 4.463       | 0.107   |              |
| 2020-07-29 | 31   | 0                    | 6      | 6    | 4          | 2  | 0.577       | 0.749   |              |
| 2020-08-04 | 32   | 0                    | 6      | 6    | 4          | 2  | 5.762       | 0.056   | *            |
| 2020-08-10 | 33   | 0                    | 6      | 6    | 4          | 2  | 7.176       | 0.028   | **           |
| 2020-08-21 | 34   | 0                    | 6      | 6    | 4          | 2  | 8.074       | 0.018   | **           |
| 2020-08-31 | 36   | 0                    | 6      | 6    | 4          | 2  | 3.347       | 0.188   |              |

|            |    |   |   |   |   |   |        |       |     |
|------------|----|---|---|---|---|---|--------|-------|-----|
| 2020-09-09 | 37 | 0 | 6 | 6 | 0 | 1 | 0.231  | 0.631 |     |
| 2020-09-15 | 38 | 0 | 6 | 6 | 4 | 2 | 4.235  | 0.120 |     |
| 2020-09-21 | 39 | 0 | 6 | 6 | 4 | 2 | 7.074  | 0.029 | **  |
| 2020-09-28 | 40 | 0 | 6 | 6 | 4 | 2 | 5.000  | 0.082 | *   |
| 2021-05-07 | 18 | 6 | 0 | 0 | 0 | - | -      | -     |     |
| 2021-05-11 | 19 | 6 | 6 | 6 | 4 | 3 | 7.344  | 0.062 | *   |
| 2021-05-20 | 20 | 6 | 6 | 6 | 4 | 3 | 6.664  | 0.083 | *   |
| 2021-05-28 | 21 | 0 | 6 | 6 | 4 | 2 | 1.721  | 0.423 |     |
| 2021-06-01 | 22 | 6 | 6 | 6 | 4 | 3 | 13.312 | 0.004 | *** |
| 2021-06-10 | 23 | 6 | 6 | 6 | 4 | 3 | 7.403  | 0.060 | *   |
| 2021-06-16 | 24 | 6 | 6 | 6 | 4 | 3 | 3.072  | 0.381 |     |
| 2021-06-24 | 25 | 0 | 6 | 6 | 3 | 2 | 0.338  | 0.844 |     |
| 2021-06-29 | 26 | 6 | 6 | 6 | 3 | 3 | 1.393  | 0.707 |     |
| 2021-07-09 | 27 | 0 | 6 | 6 | 6 | 2 | 1.768  | 0.413 |     |
| 2021-07-15 | 28 | 6 | 6 | 6 | 6 | 3 | 6.843  | 0.077 | *   |
| 2021-07-22 | 29 | 0 | 0 | 0 | 0 | - | -      | -     |     |
| 2021-07-29 | 30 | 6 | 6 | 6 | 6 | 3 | 12.980 | 0.005 | **  |
| 2021-08-03 | 31 | 0 | 6 | 6 | 6 | 2 | 3.504  | 0.173 |     |
| 2021-08-12 | 32 | 3 | 6 | 4 | 5 | 3 | 6.030  | 0.110 |     |
| 2021-08-20 | 33 | 0 | 6 | 6 | 6 | 2 | 0.947  | 0.623 |     |
| 2021-08-23 | 34 | 6 | 6 | 6 | 6 | 3 | 3.900  | 0.272 |     |
| 2021-09-02 | 35 | 0 | 6 | 6 | 6 | 2 | 5.626  | 0.060 | *   |
| 2021-09-06 | 36 | 6 | 6 | 6 | 6 | 3 | 9.376  | 0.025 | **  |
| 2021-09-14 | 37 | 0 | 6 | 6 | 6 | 2 | 8.503  | 0.014 | **  |
| 2021-09-23 | 38 | 6 | 6 | 6 | 6 | 3 | 12.180 | 0.007 | **  |
| 2021-09-30 | 39 | 0 | 6 | 6 | 6 | 2 | 10.768 | 0.005 | **  |
| 2022-05-06 | 18 | 6 | 6 | 6 | 0 | 2 | 11.240 | 0.004 | *** |
| 2022-05-11 | 19 | 6 | 6 | 6 | 0 | 2 | 10.305 | 0.006 | **  |
| 2022-05-18 | 20 | 6 | 6 | 6 | 0 | 2 | 8.465  | 0.015 | **  |
| 2022-05-24 | 21 | 6 | 6 | 6 | 0 | 2 | 2.468  | 0.291 |     |
| 2022-05-30 | 22 | 6 | 6 | 6 | 0 | 2 | 7.170  | 0.028 | **  |
| 2022-06-06 | 23 | 6 | 6 | 6 | 0 | 2 | 11.942 | 0.003 | *** |
| 2022-06-14 | 24 | 6 | 6 | 6 | 0 | 2 | 1.497  | 0.473 |     |
| 2022-06-21 | 25 | 6 | 6 | 6 | 0 | 2 | 0.561  | 0.755 |     |
| 2022-06-27 | 26 | 6 | 6 | 6 | 0 | 2 | 2.433  | 0.296 |     |
| 2022-07-05 | 27 | 6 | 6 | 6 | 0 | 2 | 3.709  | 0.157 |     |
| 2022-07-14 | 28 | 6 | 6 | 6 | 0 | 2 | 8.000  | 0.018 | **  |
| 2022-07-18 | 29 | 6 | 6 | 6 | 0 | 2 | 5.719  | 0.057 | *   |
| 2022-07-26 | 30 | 6 | 6 | 6 | 0 | 2 | 3.520  | 0.172 |     |
| 2022-08-01 | 31 | 6 | 6 | 6 | 0 | 2 | 2.889  | 0.236 |     |
| 2022-08-11 | 32 | 6 | 6 | 6 | 0 | 2 | 7.228  | 0.027 | **  |
| 2022-08-16 | 33 | 6 | 6 | 6 | 0 | 2 | 5.719  | 0.057 | *   |
| 2022-08-22 | 34 | 6 | 6 | 6 | 0 | 2 | 9.732  | 0.008 | **  |
| 2022-08-30 | 35 | 6 | 6 | 6 | 0 | 2 | 11.556 | 0.003 | *** |
| 2022-09-06 | 36 | 6 | 6 | 6 | 0 | 2 | 15.158 | 0.001 | *** |
| 2022-09-16 | 37 | 6 | 6 | 6 | 0 | 2 | 8.561  | 0.014 | **  |
| 2022-09-21 | 38 | 6 | 6 | 6 | 0 | 2 | 12.772 | 0.002 | *** |

|            |    |   |   |   |   |   |        |       |    |
|------------|----|---|---|---|---|---|--------|-------|----|
| 2022-09-26 | 39 | 6 | 6 | 6 | 0 | 2 | 10.047 | 0.007 | ** |
|------------|----|---|---|---|---|---|--------|-------|----|

**Table S3:** Results of the week-level Kruskal-Wallis tests on soil temperature. Significance is reported as: \*p-value < 0.10, \*\*p-value < 0.05, and \*\*\*p-value < 0.005. Number of replicates refers to the number of measurement replicates conducted at each site on each week, and DF refers to degrees of freedom.

| Date       | Week | Number of replicates |        |      |            | DF | H Statistic | P-value | Significance |
|------------|------|----------------------|--------|------|------------|----|-------------|---------|--------------|
|            |      | Orchard              | Forest | Park | Streetside |    |             |         |              |
| 2020-05-14 | 20   | 0                    | 0      | 0    | 0          | -  | -           | -       |              |
| 2020-05-19 | 21   | 0                    | 8      | 8    | 8          | 2  | 15.368      | 0.000   | ***          |
| 2020-05-29 | 22   | 0                    | 8      | 7    | 8          | 2  | 16.507      | 0.000   | ***          |
| 2020-06-08 | 23   | 0                    | 8      | 8    | 8          | 2  | 18.272      | 0.000   | ***          |
| 2020-06-12 | 24   | 0                    | 8      | 8    | 8          | 2  | 17.019      | 0.000   | ***          |
| 2020-06-22 | 25   | 0                    | 8      | 8    | 8          | 2  | 14.901      | 0.001   | ***          |
| 2020-06-26 | 26   | 0                    | 8      | 8    | 8          | 2  | 15.365      | 0.000   | ***          |
| 2020-07-02 | 27   | 0                    | 6      | 8    | 8          | 2  | 15.617      | 0.000   | ***          |
| 2020-07-10 | 28   | 0                    | 7      | 8    | 8          | 2  | 13.793      | 0.001   | ***          |
| 2020-07-17 | 29   | 0                    | 8      | 8    | 8          | 2  | 14.077      | 0.001   | ***          |
| 2020-07-23 | 30   | 0                    | 8      | 8    | 8          | 2  | 15.818      | 0.000   | ***          |
| 2020-07-29 | 31   | 0                    | 7      | 8    | 8          | 2  | 15.052      | 0.001   | ***          |
| 2020-08-04 | 32   | 0                    | 7      | 8    | 8          | 2  | 13.868      | 0.001   | ***          |
| 2020-08-10 | 33   | 0                    | 8      | 8    | 8          | 2  | 5.267       | 0.072   | *            |
| 2020-08-21 | 34   | 0                    | 8      | 8    | 8          | 2  | 11.115      | 0.004   | ***          |
| 2020-08-31 | 36   | 0                    | 5      | 3    | 8          | 2  | 11.458      | 0.003   | ***          |
| 2020-09-09 | 37   | 0                    | 8      | 8    | 8          | 2  | 18.240      | 0.000   | ***          |
| 2020-09-15 | 38   | 0                    | 8      | 8    | 8          | 2  | 3.280       | 0.194   |              |
| 2020-09-21 | 39   | 0                    | 8      | 8    | 8          | 2  | 9.437       | 0.009   | **           |
| 2020-09-28 | 40   | 0                    | 8      | 8    | 8          | 2  | 12.269      | 0.002   | ***          |
| 2021-05-07 | 18   | 8                    | 8      | 8    | 8          | 3  | 20.853      | 0.000   | ***          |
| 2021-05-11 | 19   | 8                    | 8      | 8    | 8          | 3  | 12.085      | 0.007   | **           |
| 2021-05-20 | 20   | 8                    | 8      | 8    | 8          | 3  | 24.743      | 0.000   | ***          |
| 2021-05-28 | 21   | 0                    | 8      | 8    | 8          | 2  | 12.031      | 0.002   | ***          |
| 2021-06-01 | 22   | 8                    | 8      | 8    | 8          | 3  | 21.075      | 0.000   | ***          |
| 2021-06-10 | 23   | 8                    | 8      | 8    | 8          | 3  | 25.804      | 0.000   | ***          |
| 2021-06-16 | 24   | 8                    | 8      | 8    | 8          | 3  | 21.793      | 0.000   | ***          |
| 2021-06-24 | 25   | 0                    | 8      | 8    | 8          | 2  | 16.980      | 0.000   | ***          |
| 2021-06-29 | 26   | 8                    | 8      | 8    | 0          | 2  | 12.484      | 0.002   | ***          |
| 2021-07-09 | 27   | 0                    | 8      | 8    | 8          | 2  | 15.655      | 0.000   | ***          |
| 2021-07-15 | 28   | 8                    | 8      | 8    | 8          | 3  | 17.193      | 0.001   | ***          |
| 2021-07-22 | 29   | 0                    | 8      | 8    | 8          | 2  | 18.240      | 0.000   | ***          |
| 2021-07-29 | 30   | 8                    | 8      | 8    | 8          | 3  | 21.259      | 0.000   | ***          |
| 2021-08-03 | 31   | 0                    | 8      | 8    | 8          | 2  | 20.165      | 0.000   | ***          |
| 2021-08-12 | 32   | 8                    | 8      | 8    | 8          | 3  | 17.263      | 0.001   | ***          |
| 2021-08-20 | 33   | 0                    | 8      | 8    | 8          | 2  | 16.234      | 0.000   | ***          |
| 2021-08-23 | 34   | 8                    | 8      | 8    | 8          | 3  | 20.538      | 0.000   | ***          |
| 2021-09-02 | 35   | 0                    | 8      | 8    | 8          | 2  | 4.353       | 0.113   |              |

|            |    |   |   |   |   |   |        |       |     |
|------------|----|---|---|---|---|---|--------|-------|-----|
| 2021-09-06 | 36 | 8 | 8 | 8 | 5 | 3 | 16.665 | 0.001 | *** |
| 2021-09-14 | 37 | 0 | 8 | 8 | 8 | 2 | 10.665 | 0.005 | **  |
| 2021-09-23 | 38 | 8 | 8 | 8 | 8 | 3 | 13.760 | 0.003 | *** |
| 2021-09-30 | 39 | 0 | 8 | 8 | 8 | 2 | 6.528  | 0.038 | **  |
| 2022-05-06 | 18 | 8 | 8 | 8 | 0 | 2 | 19.574 | 0.000 | *** |
| 2022-05-11 | 19 | 8 | 8 | 8 | 0 | 2 | 11.922 | 0.003 | *** |
| 2022-05-18 | 20 | 8 | 8 | 8 | 0 | 2 | 7.128  | 0.028 | **  |
| 2022-05-24 | 21 | 8 | 8 | 8 | 0 | 2 | 8.694  | 0.013 | **  |
| 2022-05-30 | 22 | 2 | 8 | 8 | 0 | 2 | 11.284 | 0.004 | *** |
| 2022-06-06 | 23 | 8 | 8 | 8 | 0 | 2 | 15.679 | 0.000 | *** |
| 2022-06-14 | 24 | 8 | 8 | 8 | 0 | 2 | 11.540 | 0.003 | *** |
| 2022-06-21 | 25 | 8 | 8 | 8 | 0 | 2 | 17.565 | 0.000 | *** |
| 2022-06-27 | 26 | 8 | 8 | 8 | 0 | 2 | 1.284  | 0.526 |     |
| 2022-07-05 | 27 | 8 | 8 | 8 | 0 | 2 | 1.355  | 0.508 |     |
| 2022-07-14 | 28 | 8 | 8 | 8 | 0 | 2 | 12.660 | 0.002 | *** |
| 2022-07-18 | 29 | 8 | 8 | 8 | 0 | 2 | 17.420 | 0.000 | *** |
| 2022-07-26 | 30 | 8 | 8 | 8 | 0 | 2 | 2.027  | 0.363 |     |
| 2022-08-01 | 31 | 8 | 8 | 8 | 0 | 2 | 6.582  | 0.037 | **  |
| 2022-08-11 | 32 | 8 | 8 | 8 | 0 | 2 | 3.094  | 0.213 |     |
| 2022-08-16 | 33 | 8 | 8 | 8 | 0 | 2 | 0.875  | 0.646 |     |
| 2022-08-22 | 34 | 8 | 8 | 8 | 0 | 2 | 7.215  | 0.027 | **  |
| 2022-08-30 | 35 | 8 | 8 | 8 | 0 | 2 | 14.895 | 0.001 | *** |
| 2022-09-06 | 36 | 8 | 8 | 8 | 0 | 2 | 16.045 | 0.000 | *** |
| 2022-09-16 | 37 | 8 | 8 | 8 | 0 | 2 | 0.135  | 0.935 |     |
| 2022-09-21 | 38 | 8 | 8 | 8 | 0 | 2 | 2.459  | 0.292 |     |
| 2022-09-26 | 39 | 8 | 8 | 8 | 0 | 2 | 2.643  | 0.267 |     |

---
